# Supplementary material for: Assessment of Air Pollution in Different Areas (Urban, Suburban, and Rural) in Slovenia from 2017 to 2021
Source: MDPI journal article supplement (doi:10.3390/atmos14030578), 2023-03-17
Supplement: s1 [file s1]

A

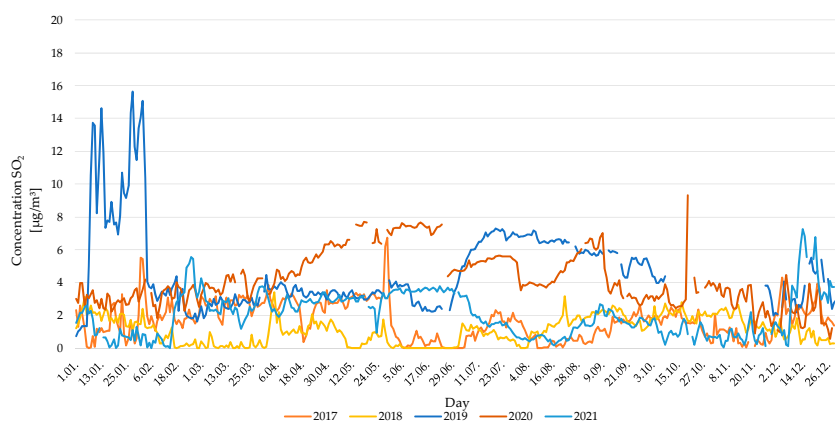

B

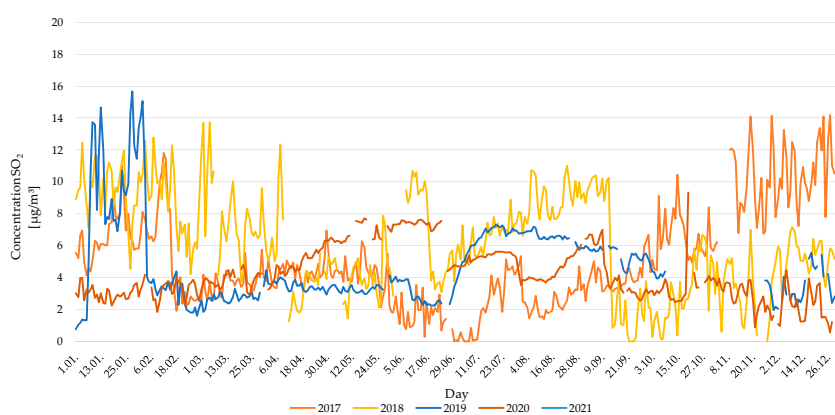

D

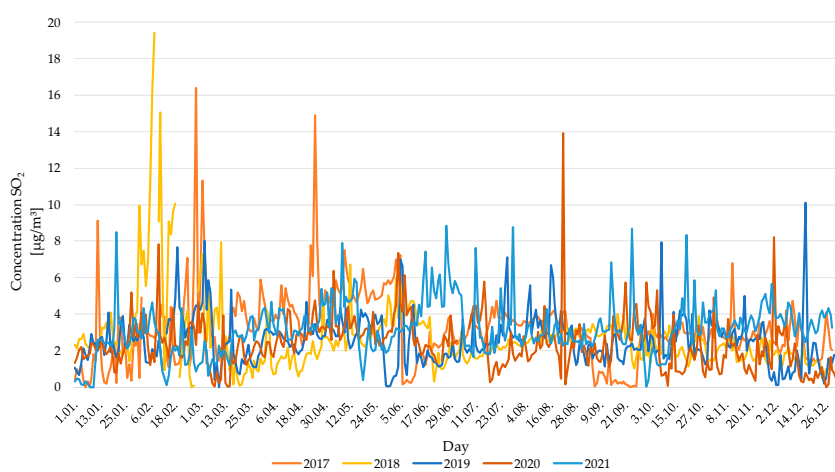

E

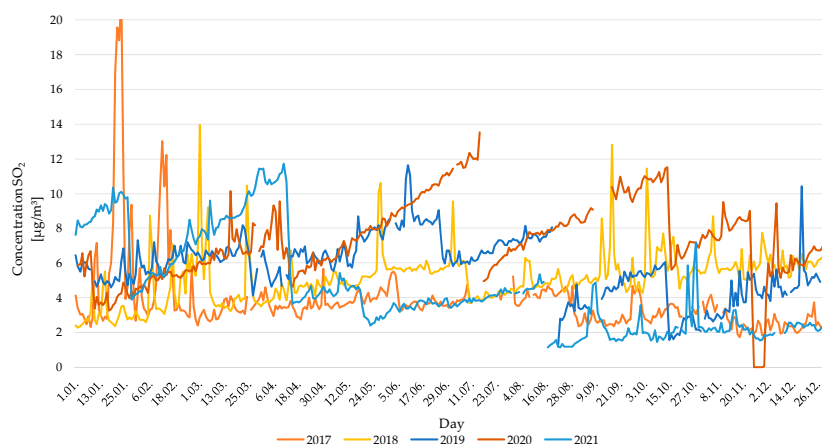

Figure S1: Average daily SO<sub>2</sub> concentrations at locations (A-E) between 2017 and 2021.

Table S1: Average, minimum, and maximum daily SO<sub>2</sub> concentrations (µg/m<sup>3</sup>) at all locations between 2017 and 2021.

|      |         | A          | B          | D          | E          |
|------|---------|------------|------------|------------|------------|
| 2017 | average | 1.66±0.08  | 5.04±0.25  | 3.17±0.16  | 3.80±0.19  |
|      | min.    | 0.00±0.00  | 0.00±0.00  | 0.00±0.00  | 1.74±0.09  |
|      | max.    | 6.72±0.33  | 14.19±0.71 | 16.40±0.82 | 21.56±1.08 |
| 2018 | average | 1.11±0.05  | 6.13±0.31  | 2.67±0.13  | 5.10±0.25  |
|      | min.    | 0.00±0.00  | 0.00±0.00  | 0.00±0.00  | 2.25±0.11  |
|      | max.    | 3.39±0.17  | 13.75±0.69 | 19.45±0.97 | 13.95±0.70 |
| 2019 | average | 4.69±0.23  | 8.02±0.40  | 2.55±0.13  | 5.76±0.29  |
|      | min.    | 0.74±0.04  | 0.00±0.00  | 0.00±0.00  | 1.25±0.06  |
|      | max.    | 15.66±0.78 | 20.32±1.02 | 10.12±0.51 | 11.64±0.58 |
| 2020 | average | 4.23±0.21  | 10.23±0.51 | 2.37±0.12  | 7.27±0.36  |
|      | min.    | 0.57±0.03  | 0.00±0.00  | 0.00±0.00  | 0.00±0.00  |
|      | max.    | 9.33±0.47  | 20.47±1.02 | 13.93±0.70 | 13.53±0.68 |
| 2021 | average | 2.01±0.10  | 1.28±0.06  | 3.16±0.16  | 4.52±0.23  |
|      | min.    | 0.00±0.00  | 0.00±0.00  | 0.00±0.00  | 1.23±0.06  |
|      | max.    | 7.24±0.36  | 20.47±1.02 | 8.83±0.44  | 11.71±0.59 |

# NO<sub>2</sub>

A

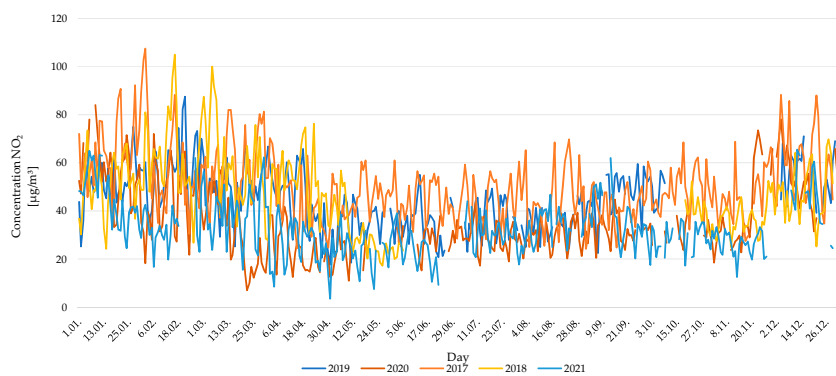

B

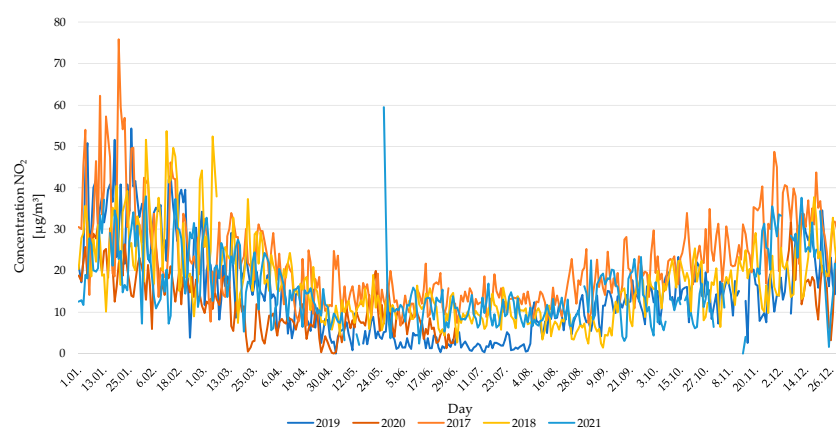

D

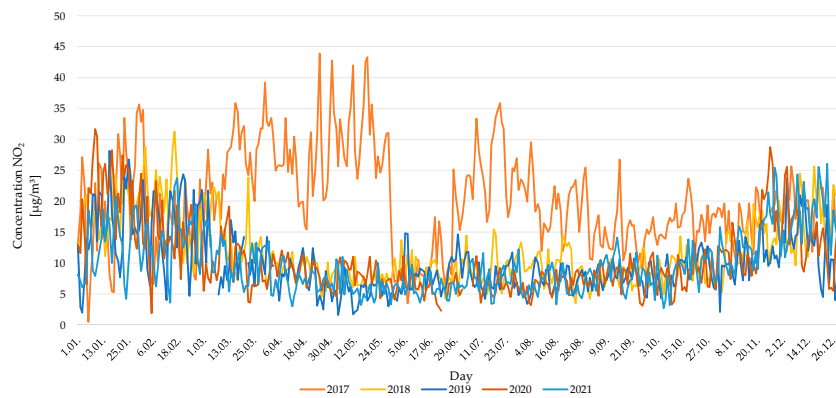

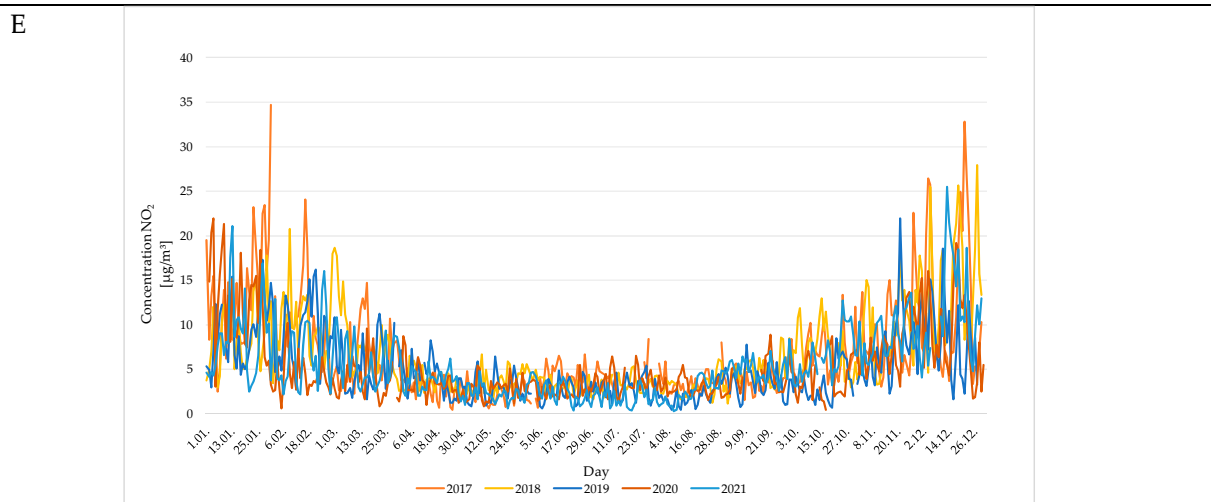

Figure S2: Average daily NO<sub>2</sub> concentrations at locations (A-E) between 2017 and 2021.

Table S2: Average, minimum, and maximum daily NO<sub>2</sub> concentrations (µg/m<sup>3</sup>) at all locations between 2017 and 2021.

|      |         | A           | B          | D          | E          |
|------|---------|-------------|------------|------------|------------|
| 2017 | average | 50.23±2.51  | 21.99±1.10 | 20.02±1.00 | 6.63±0.33  |
|      | min.    | 24.18±1.21  | 6.69±0.33  | 0.54±0.03  | 0.44±0.02  |
|      | max.    | 107.36±5.37 | 75.85±3.79 | 43.94±2.20 | 34.65±1.73 |
| 2018 | average | 47.65±2.38  | 17.02±0.85 | 11.74±0.59 | 6.57±0.33  |
|      | min.    | 17.16±0.86  | 1.47±0.07  | 3.53±0.18  | 1.14±0.06  |
|      | max.    | 105.01±5.25 | 53.62±2.68 | 31.27±1.56 | 27.88±1.39 |
| 2019 | average | 44.87±2.24  | 14.42±0.72 | 10.01±0.50 | 5.05±0.25  |
|      | min.    | 17.77±0.89  | 0.01±0.00  | 1.61±0.08  | 0.45±0.02  |
|      | max.    | 87.51±4.38  | 54.25±2.71 | 28.15±1.41 | 21.91±1.10 |
| 2020 | average | 35.44±1.77  | 12.25±0.61 | 10.39±0.52 | 5.08±0.25  |
|      | min.    | 6.92±0.35   | 0.00±0.00  | 1.90±0.10  | 0.43±0.02  |
|      | max.    | 65.38±4.19  | 31.82±1.59 | 31.70±1.59 | 21.92±1.10 |
| 2021 | average | 32.54±1.63  | 15.75±0.79 | 9.86±0.49  | 5.42±0.27  |
|      | min.    | 24.35±1.22  | 0.00±0.00  | 2.71±0.14  | 0.31±0.02  |
|      | max.    | 65.38±3.27  | 59.38±2.97 | 26.04±1.30 | 25.49±1.27 |

## NO<sub>x</sub>

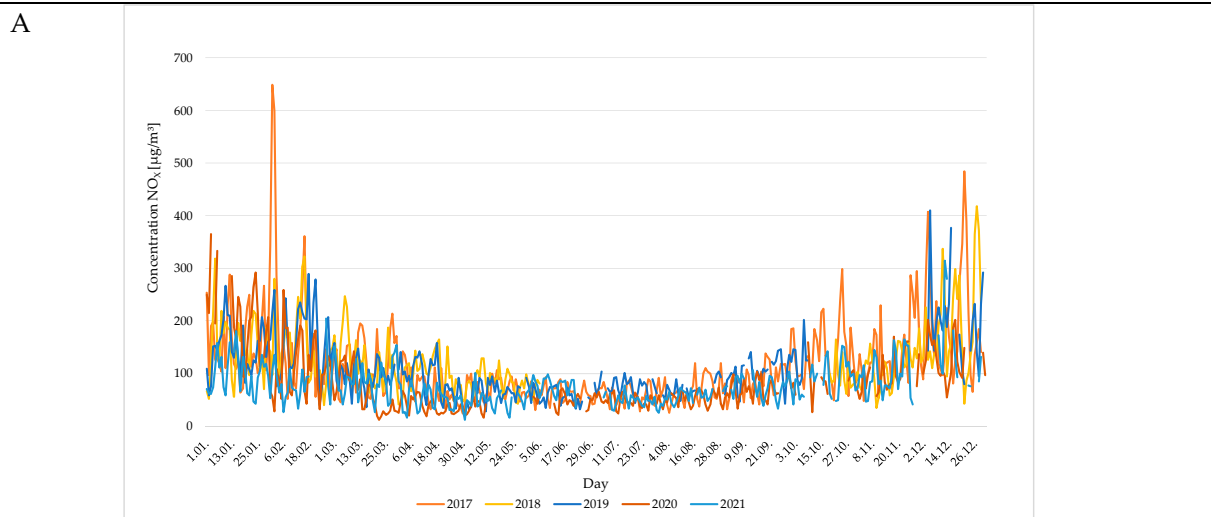

B

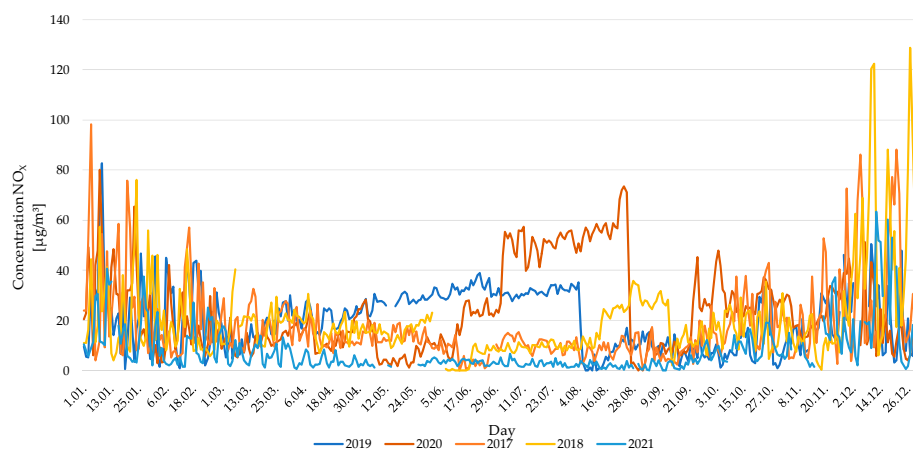

D

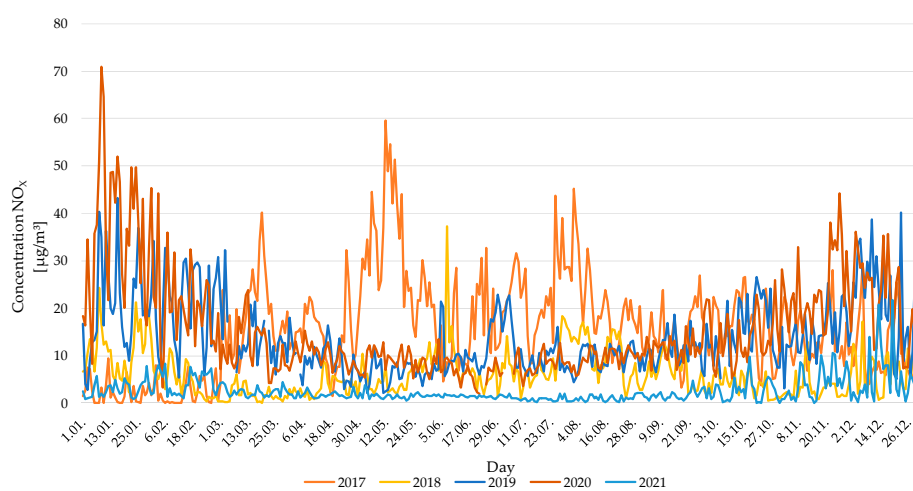

E

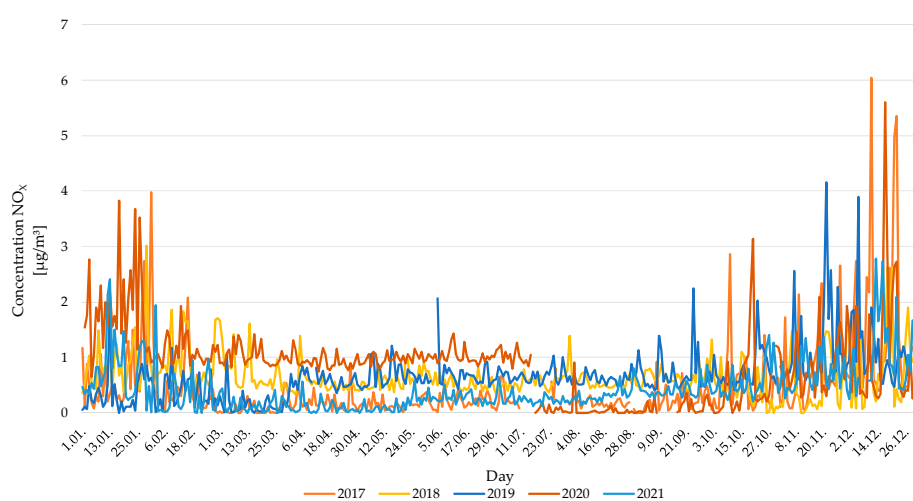

Figure S3: Average daily NO<sub>x</sub> concentrations at locations (A-E) between 2017 and 2021.

Table S3: Average, minimum, and maximum daily NO<sub>x</sub> concentrations (µg/m<sup>3</sup>) at all locations between 2017 and 2021.

|      |         | A            | B           | D          | E         |
|------|---------|--------------|-------------|------------|-----------|
| 2017 | average | 111.76±5.59  | 16.90±0.85  | 15.44±0.77 | 0.46±0.02 |
|      | min.    | 24.49±1.22   | 0.04±0.00   | 0.00±0.00  | 0.00±0.00 |
|      | max.    | 649.00±32.45 | 98.18±4.91  | 59.50±2.98 | 4.16±0.21 |
| 2018 | average | 127.07±6.35  | 19.41±0.97  | 6.08±0.30  | 0.65±0.03 |
|      | min.    | 34.37±1.72   | 0.00±0.00   | 0.12±0.01  | 0.00±0.00 |
|      | max.    | 418.31±20.92 | 128.79±6.44 | 37.29±1.86 | 5.61±0.28 |
| 2019 | average | 213.85±10.69 | 20.32±1.02  | 13.77±0.69 | 0.65±0.03 |
|      | min.    | 22.04±1.10   | 0.02±0.00   | 2.10±0.11  | 0.00±0.00 |
|      | max.    | 302.06±15.10 | 82.59±4.13  | 43.29±2.16 | 4.16±0.21 |
| 2020 | average | 81.66±4.08   | 23.59±1.18  | 15.31±0.77 | 0.86±0.04 |
|      | min.    | 11.96±0.60   | 0.00±0.00   | 1.99±0.10  | 0.00±0.00 |
|      | max.    | 452.93±22.65 | 80.09±4.00  | 70.83±3.54 | 5.61±0.28 |
| 2021 | average | 77.02±3.85   | 7.765±0.39  | 2.54±0.13  | 0.41±0.02 |
|      | min.    | 11.89±0.59   | 0.00±0.00   | 0.02±0.00  | 0.00±0.00 |
|      | max.    | 314.43±15.72 | 63.34±3.17  | 21.75±1.09 | 2.77±0.14 |

## PM<sub>10</sub>

A

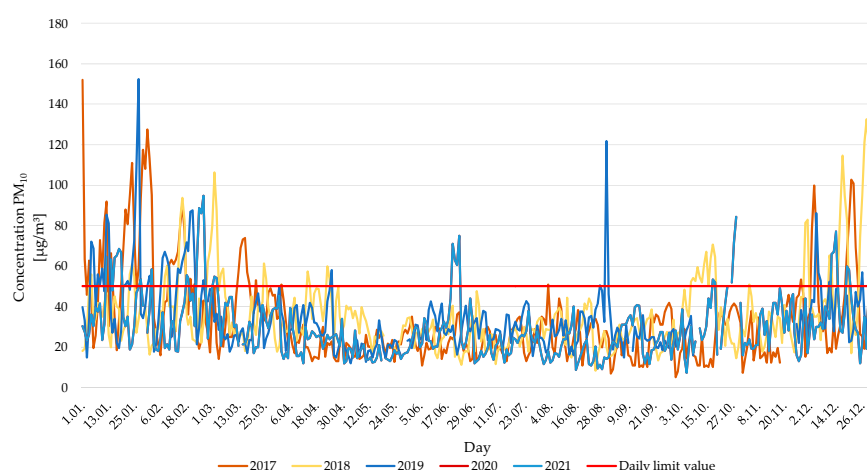

B

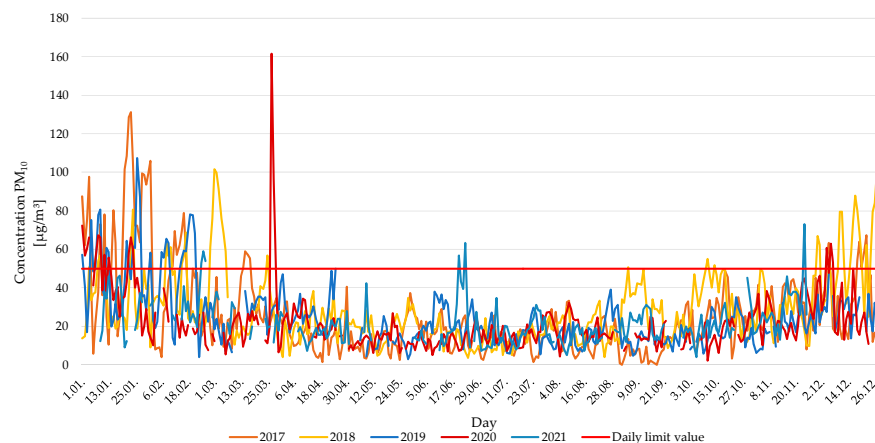

C

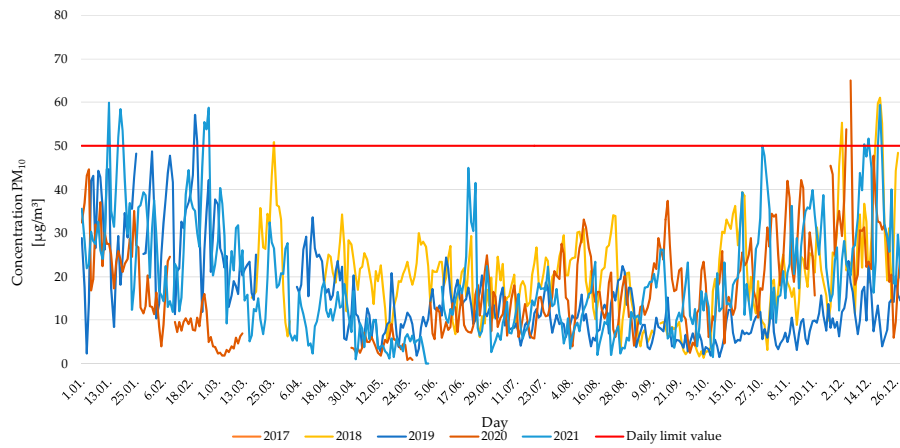

D

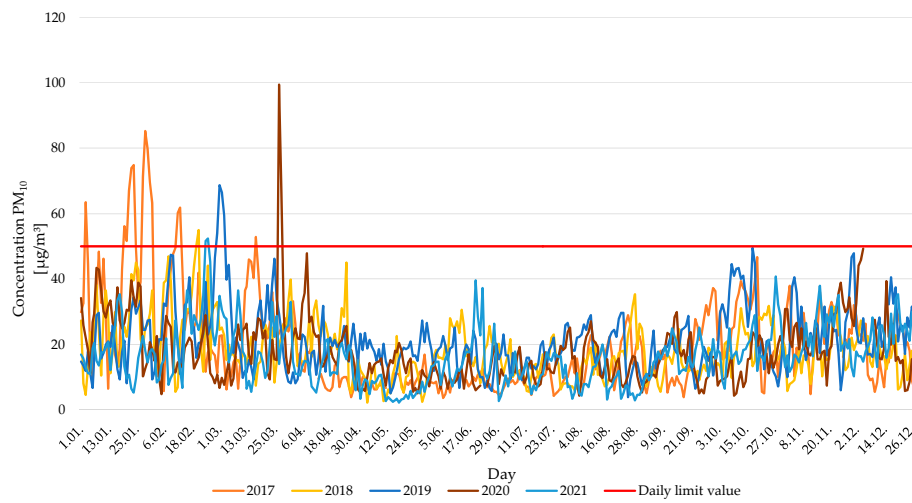

Figure S4: Average daily PM<sub>10</sub> concentrations at locations (A-E) between 2017 and 2021.

Table S4: Average, minimum, and maximum daily PM<sub>10</sub> concentrations (µg/m<sup>3</sup>) at all locations between 2017 and 2021.

|       |         | A           | B           | C          | D          |
|-------|---------|-------------|-------------|------------|------------|
| 2017  | average | 32.72±1.64  | 25.25±1.26  | N.A.       | 19.61±0.98 |
|       | min.    | 5.26±0.26   | 0.00±0.00   | N.A.       | 3.00±0.15  |
|       | max.    | 152.13±7.61 | 131.10±6.56 | N.A.       | 50.00±2.50 |
| 2018* | average | 35.48±1.77  | 28.86±1.44  | 20.42±1.02 | 21.47±1.07 |
|       | min.    | 8.35±0.42   | 3.50±0.18   | 0.00±0.00  | 3.91±0.20  |
|       | max.    | 132.58±6.63 | 101.50±5.08 | 69.70±3.49 | 85.16±4.26 |
| 2019  | average | 34.11±1.71  | 24.07±1.20  | 14.95±0.75 | 18.00±0.89 |
|       | min.    | 11.87±0.59  | 2.88±0.14   | 1.51±0.04  | 2.23±0.11  |
|       | max.    | 152.57±7.63 | 107.22±5.36 | 57.06±2.85 | 55.01±2.75 |
| 2020  | average | 30.31±1.52  | 21.80±1.09  | 16.87±0.84 | 18.00±0.89 |
|       | min.    | 8.00±0.40   | 2.19±0.11   | 0.85±0.04  | 4.26±0.21  |
|       | max.    | 195.00±9.75 | 161.64±8.08 | 64.93±3.25 | 99.31±4.97 |
| 2021  | average | 29.06±1.45  | 21.61±1.08  | 18.94±0.95 | 16.00±0.81 |
|       | min.    | 7.18±0.36   | 4.00±0.20   | 0.00±0.00  | 2.17±0.11  |
|       | max.    | 94.82±4.74  | 73.00±3.65  | 59.94±3.00 | 52.43±2.62 |

\* now hole year is taken into account.

PM<sub>2.5</sub>

A

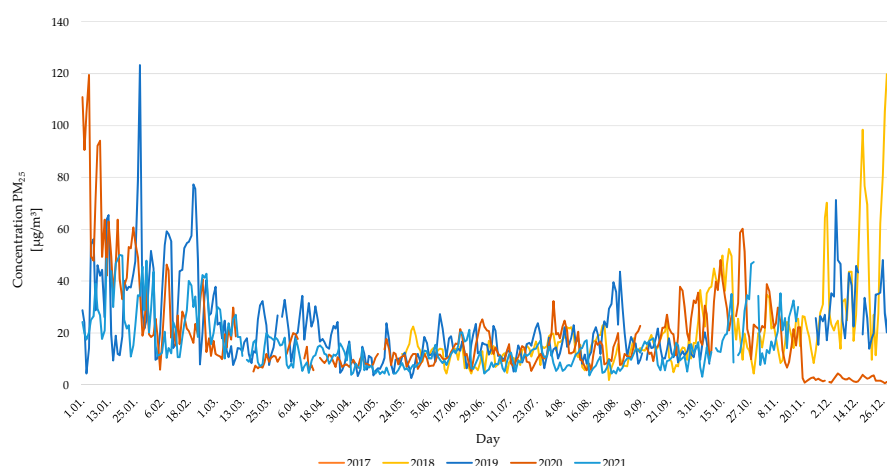

D

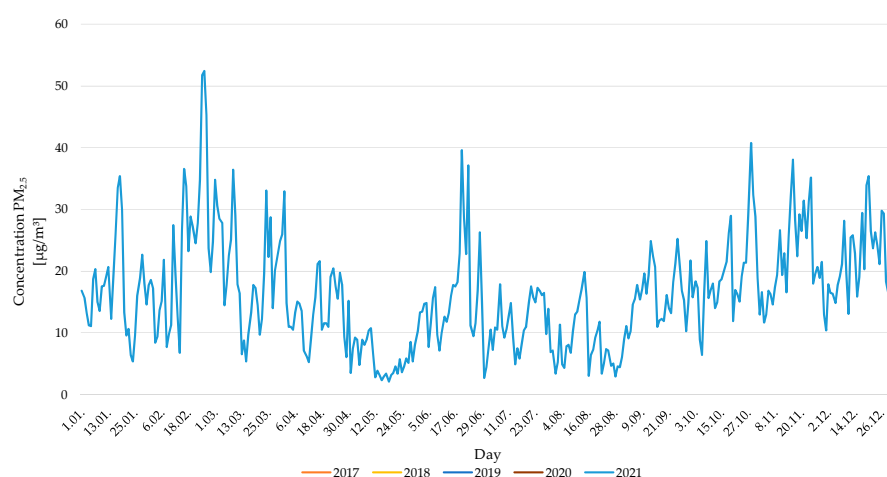

Figure S5: Average daily PM<sub>2.5</sub> concentrations at locations (A-E) between 2017 and 2021.

Table S5: Average, minimum, and maximum daily PM<sub>2.5</sub> concentrations (µg/m<sup>3</sup>) at all locations between 2017 and 2021.

|      |         | A            | D          |
|------|---------|--------------|------------|
| 2017 | average | 0.00±0.00    | N.A.       |
|      | min.    | 0.00±0.00    | N.A.       |
|      | max.    | 0.00±0.00    | N.A.       |
| 2018 | average | 20.91±1.05   | N.A.       |
|      | min.    | 1.90±0.09    | N.A.       |
|      | max.    | 119.78±5.99  | N.A.       |
| 2019 | average | 22.00±1.09   | N.A.       |
|      | min.    | 2.50±0.13    | N.A.       |
|      | max.    | 123.386±6.17 | N.A.       |
| 2020 | average | 18.00±0.90   | N.A.       |
|      | min.    | 0.57±0.03    | N.A.       |
|      | max.    | 119.56±5.98  | N.A.       |
| 2021 | average | 15.00±0.76   | 15.47±0.77 |
|      | min.    | 3.00±0.15    | 2.03±0.10  |
|      | max.    | 50.08±2.50   | 48.43±2.42 |



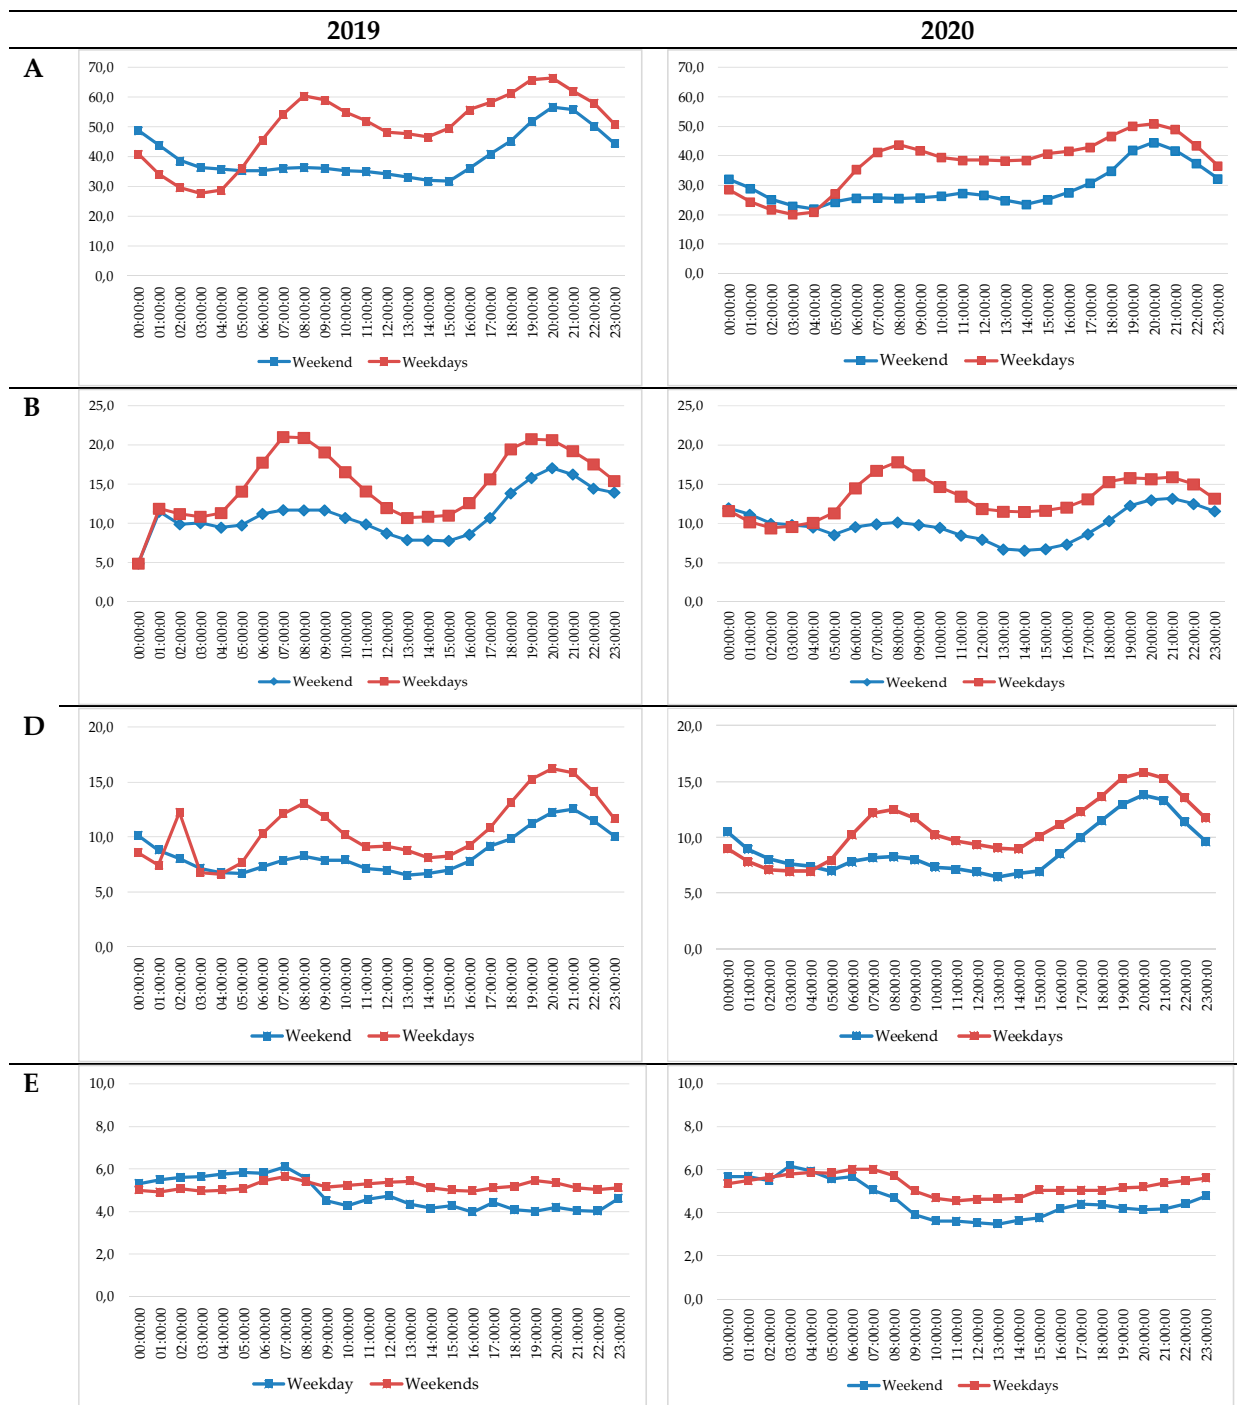

Figure S6: Daily course of the average hourly NO<sub>2</sub> concentration levels at measuring points between 2019 and 2020.

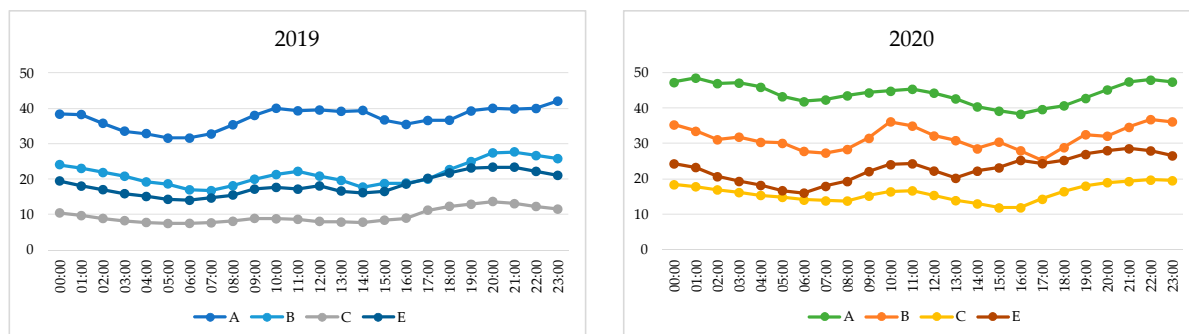

Figure S7: Daily course of the average hourly PM<sub>10</sub> concentration levels during the heating season 2019 and 2020.

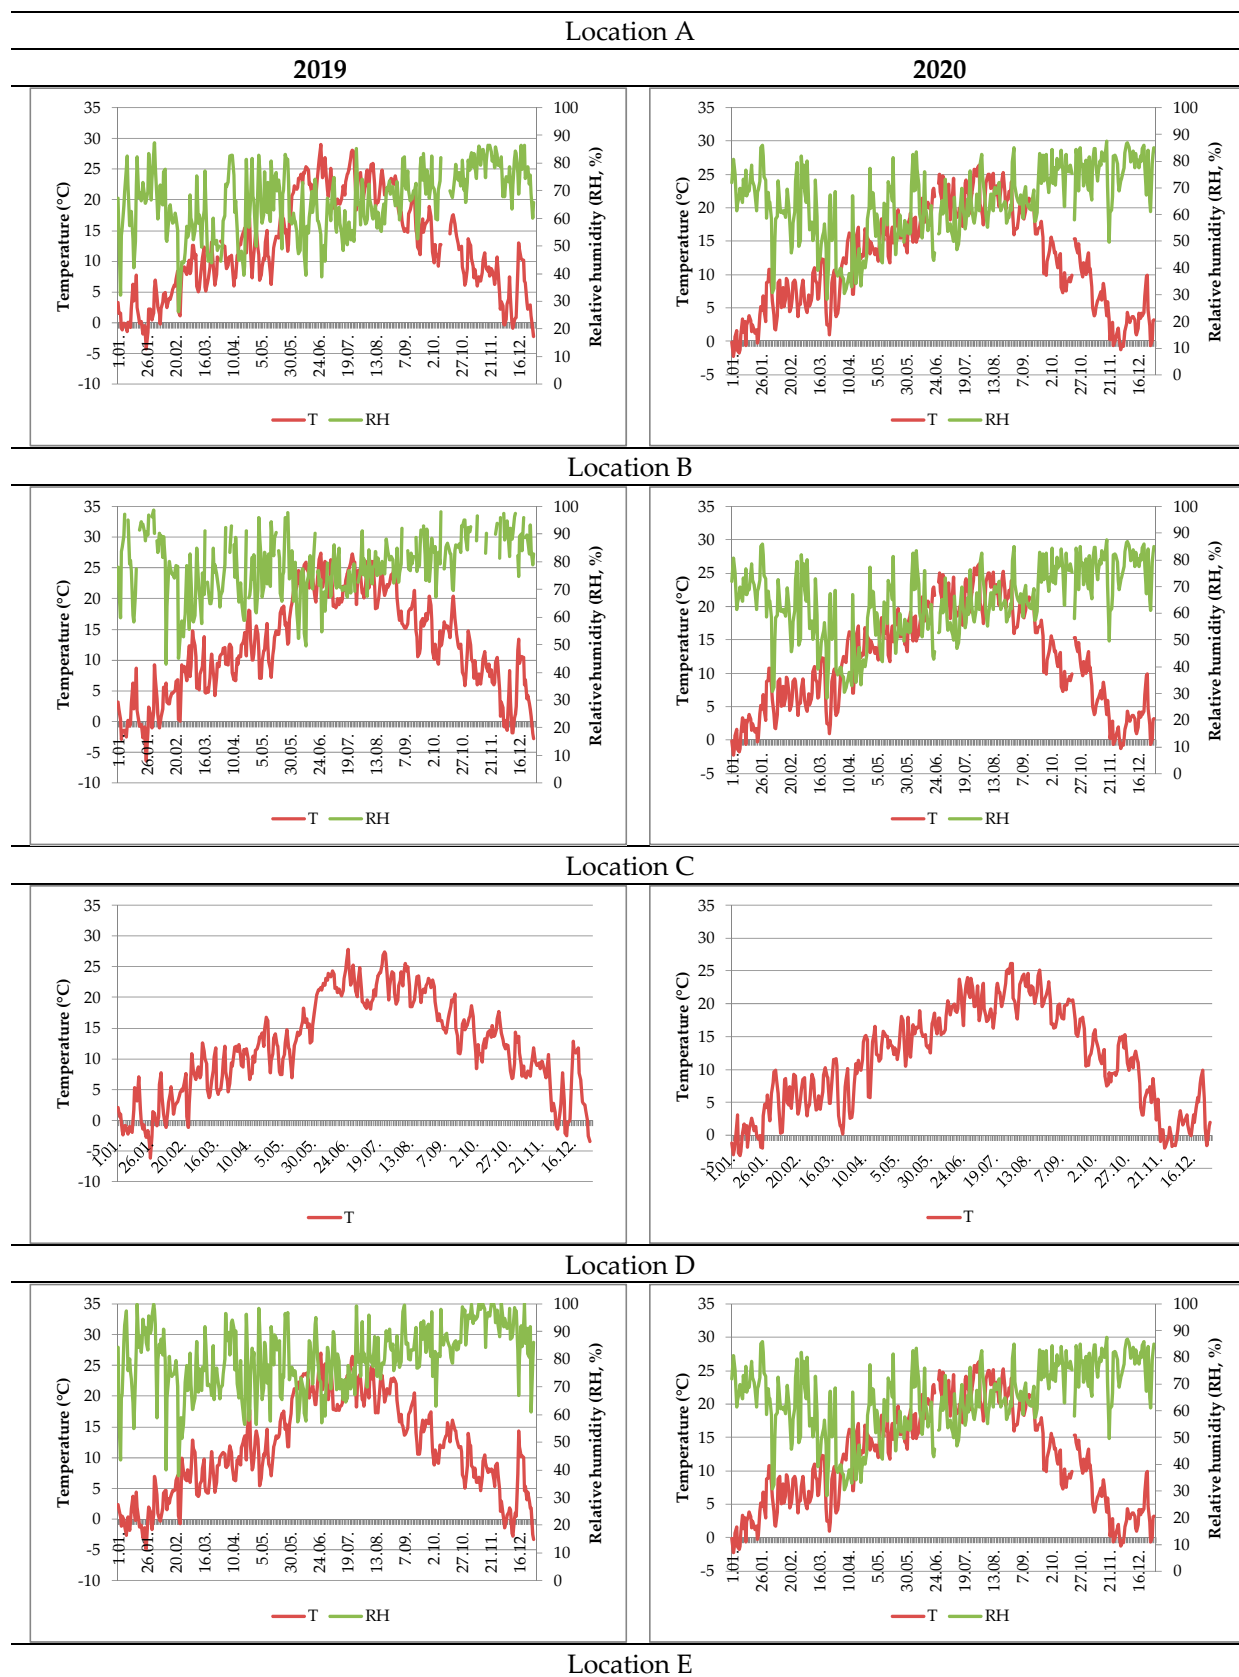

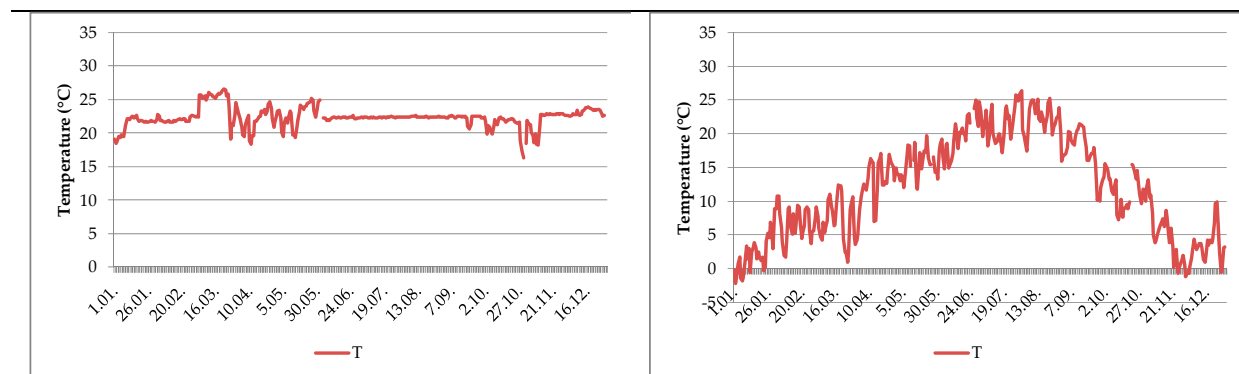

Figure S8: Plots of temperature and RH at locations (A-E) between 2019 and 2020.
